# Supplementary material
Source: PubMed Central journal article supplement (PMC5225298)

Supplemental figure 1. Wang Y et.al.

A

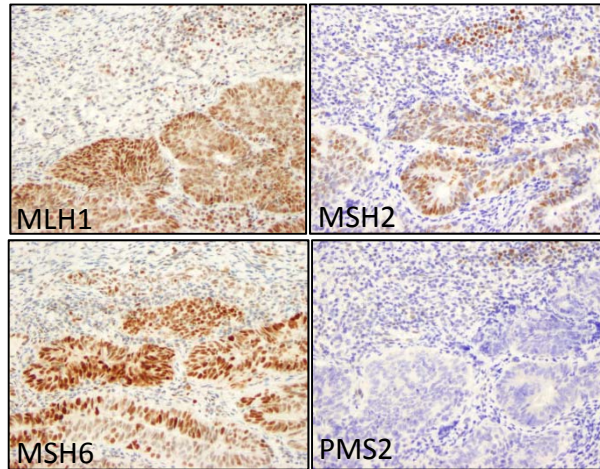

B

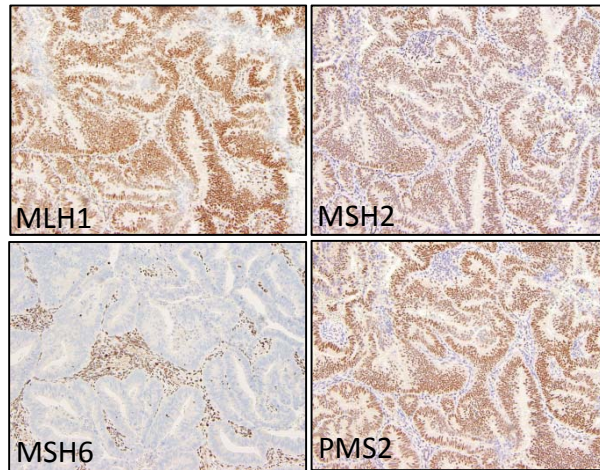

Supplement: mmc1.pdf [file mmc1.pdf]

Supplemental figure 2. Wang Y et.al.

A

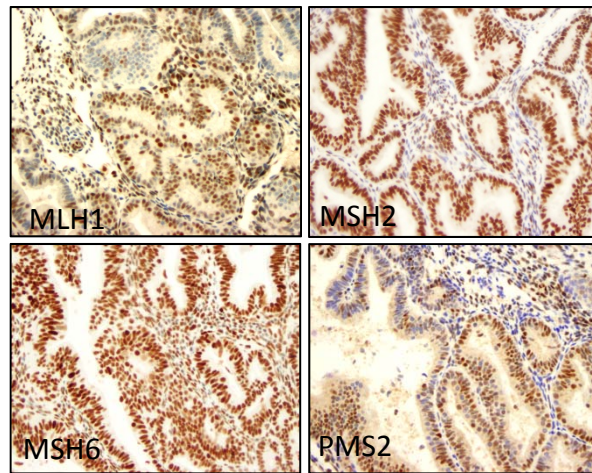

B

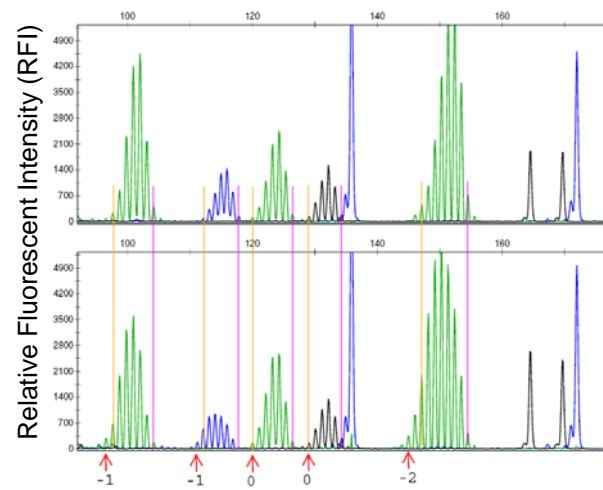

Supplement: mmc2.pdf [file mmc2.pdf]
